# Supplementary material
Source: publisher figshare collection journal article supplement (https://acs.figshare.com/ndownloader/files/4357645)
Supplement: Supplementary file 1 [file 4357645]

## Supporting Information

### On the use of ionic liquids to tune crystallization

*Magdalena Kowacz,\* Patrick Groves, José M.S.S. Esperança, Luís Paulo N. Rebelo\**

Instituto de Tecnologia Química e Biológica ([www.itqb.unl.pt](http://www.itqb.unl.pt)), Universidade Nova de Lisboa,  
Av. da República, 2780-157 Oeiras, Portugal

\*E-mail addresses: [magda@itqb.unl.pt](mailto:magda@itqb.unl.pt); [luís.rebelo@itqb.unl.pt](mailto:luís.rebelo@itqb.unl.pt)

Table 1. Diffusion coefficients of water, cations and anions of ILs at different IL concentrations as obtained by DOSY experiments. The diffusion of H<sub>2</sub>O in the IL-free system has been determined as  $D_0 = 2.47(\text{m}^2 \cdot \text{s}^{-1}) \cdot 10^{-9}$ .

| IL type                                 | Diffusing species | IL concentration, $C_{\text{IL}} / \text{M}$                            |        |       |       |       |       |        |         |
|-----------------------------------------|-------------------|-------------------------------------------------------------------------|--------|-------|-------|-------|-------|--------|---------|
|                                         |                   | 1                                                                       | 0.8825 | 0.5   | 0.25  | 0.125 | 0.025 | 0.0125 | 0.00625 |
|                                         |                   | Diffusion coefficient $D \cdot 10^9 / (\text{m}^2 \cdot \text{s}^{-1})$ |        |       |       |       |       |        |         |
| [EMIM][Ac]                              | H <sub>2</sub> O  | 1.605                                                                   |        | 2.024 | 2.28  |       | 2.375 |        |         |
|                                         | cation            | 0.665                                                                   |        | 0.832 | 0.935 |       | 0.99  |        |         |
|                                         | anion             | 0.665                                                                   |        | 0.86  | 0.965 |       | 0.99  |        |         |
| [Ch][Ac]                                | H <sub>2</sub> O  | 1.72                                                                    |        |       | 2.3   |       | 2.366 |        |         |
|                                         | cation            | 0.675                                                                   |        |       | 0.916 |       | 1     |        |         |
|                                         | anion             | 0.72                                                                    |        |       | 0.995 |       | 1.02  |        |         |
| [Ch][C <sub>1</sub> SO <sub>3</sub> ]   | H <sub>2</sub> O  | 1.87                                                                    |        | 2.19  | 2.324 |       | 2.356 |        |         |
|                                         | cation            | 0.733                                                                   |        | 0.877 | 0.95  |       | 0.985 |        |         |
|                                         | anion             | 0.858                                                                   |        | 0.998 | 1.105 |       | 1.14  |        |         |
| [EMIM][C <sub>2</sub> SO <sub>3</sub> ] | H <sub>2</sub> O  |                                                                         |        | 2.058 | 2.25  |       | 2.356 |        |         |
|                                         | cation            |                                                                         |        | 0.821 | 0.908 |       | 0.995 |        |         |
|                                         | anion             |                                                                         |        | 0.821 | 0.908 |       | 0.995 |        |         |
| [EMIM][C <sub>3</sub> SO <sub>3</sub> ] | H <sub>2</sub> O  |                                                                         |        | 1.905 | 2.18  |       |       |        |         |
|                                         | cation            |                                                                         |        | 0.743 | 0.876 |       |       |        |         |
|                                         | anion             |                                                                         |        | 0.675 | 0.8   |       |       |        |         |
| [EMIM][C <sub>4</sub> SO <sub>3</sub> ] | H <sub>2</sub> O  | 1.48                                                                    |        | 1.99  | 2.15  |       | 2.37  |        |         |
|                                         | cation            | 0.598                                                                   |        | 0.777 | 0.86  |       | 1.01  |        |         |
|                                         | anion             | 0.496                                                                   |        | 0.656 | 0.74  |       | 0.87  |        |         |
| [EMIM]Cl                                | H <sub>2</sub> O  | 1.95                                                                    |        | 2.22  | 2.356 |       | 2.35  |        |         |
|                                         | cation            | 0.81                                                                    |        | 0.924 | 0.955 |       | 1.01  |        |         |
| [Ch]Cl                                  | H <sub>2</sub> O  |                                                                         | 2.107  |       | 2.39  | 2.425 | 2.384 |        |         |
|                                         | cation            |                                                                         | 0.86   |       | 0.98  | 1.005 | 1.01  |        |         |
| [EMIM]Br                                | H <sub>2</sub> O  | 2.095                                                                   |        | 2.295 | 2.372 |       | 2.38  |        |         |
|                                         | cation            | 0.84                                                                    |        | 0.935 | 0.985 |       | 1.01  |        |         |
| [EMIM][SCN]                             | H <sub>2</sub> O  | 2.04                                                                    |        | 2.29  | 2.386 |       | 2.365 |        |         |
|                                         | cation            | 0.83                                                                    |        | 0.928 | 0.98  |       | 1.03  |        |         |
| [EMIM][(CN) <sub>4</sub> B]             | H <sub>2</sub> O  |                                                                         |        |       |       |       | 2.357 | 2.44   | 2.385   |
|                                         | cation            |                                                                         |        |       |       |       | 0.99  | 1.03   |         |

### **Solution enthalpy: Frequency of water exchange and the influence of background ions.**

The measured enthalpy of solution of  $\text{BaCl}_2$  (distinct for different background chloride salts)<sup>S1</sup> results from the energy gained on creating ion-water interactions -  $E_i$  (affected by the association of the background ions in solution) and the energy expended on breaking existing water-water bonds -  $E_0$  (dependent on the water affinity of background ions). This energy difference ( $\Delta E_i = E_i - E_0$ ) is the quantity that describes the relative frequency of water exchange in the ion's hydration shell with respect to its exchange in the bulk<sup>S2-S3</sup>. Such dependence is explained by the reaction rate theory which relates activation energies of the transfer process  $E_i$  ( $E_0$ ) to the mean residence time ( $\tau$ )<sup>S3</sup>:

$$\frac{\tau_i}{\tau_0} = e^{\beta(E_i - E_0)} \quad (1)$$

where  $\beta = 1/k_B T$ ,  $k_B$  is the Boltzmann's constant,  $T$  is the absolute temperature and  $\tau_i$  ( $\tau_0$ ) is the mean residence time of water in the nearest vicinity of the ion (and in the bulk).

### **Heat capacity: Hydration of ([EMIM][ $(\text{CN})_4\text{B}$ ]) and association of [EMIM][SCN].**

As can be seen in Figure S1, with increasing molar fraction of the solute ([EMIM][ $(\text{CN})_4\text{B}$ ]), the molar heat capacity of solution increases up to a certain point and then starts to decrease. Such behavior is typically recognized as a sign of hydrophobic hydration of the solute<sup>S4</sup> that results in the initial increase in the heat capacity due to the reinforcement of the water structure. The further decrease is a consequence of solute association in solution. Note that [EMIM][ $(\text{CN})_4\text{B}$ ] is weakly soluble in water and it is expected to significantly associate at higher concentrations. The effect of hydrophobic hydration is not supposed to be induced by  $[\text{EMIM}]^+$ , because this behavior is not observed for any other  $[\text{EMIM}]^+$  based IL. A similar pattern – namely, the relatively sharp decrease in the heat capacity

starting from a particular concentration – is exhibited also by [EMIM][SCN]. Again, this fact supports our conclusion about the [EMIM][SCN] association.

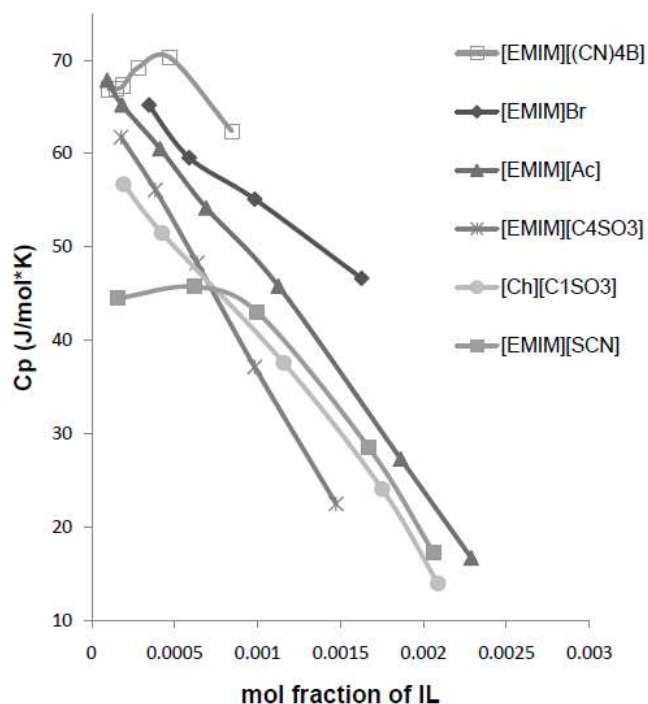

Figure S1. Molar heat capacity ( $C_p$ ) isotherms (25 °C), of aqueous solutions of ILs as a function of their molar fraction.

## References:

- [S1] Kowacz M.; Prieto M.; Putnis A. *Geochim. Cosmochim. Acta* **2010**, 74, 469-481.
- [S2] Samoilov O. Y. *Structure of Aqueous Electrolyte Solutions and the Hydration of Ions*. Consultants Bureau, New York **1965**, pp. 74–106.
- [S3] Chong S.-H.; Hirata F. *J. Phys. Chem.* **1997**, 101, 3209–3220.
- [S4] Piekarski H.; Tkaczyk M. *Termochim. Acta* **2005**, 428, 113-118.
